# Supplementary material for: Osmunda pulchella sp. nov. from the Jurassic of Sweden—reconciling molecular and fossil evidence in the phylogeny of modern royal ferns (Osmundaceae)
Source: PubMed Central journal article supplement (PMC4487210; doi:10.1186/s12862-015-0400-7), 2015-06-30
Supplement: 12862_2015_400_MOESM2_ESM.pdf [file 12862_2015_400_MOESM2_ESM.pdf]

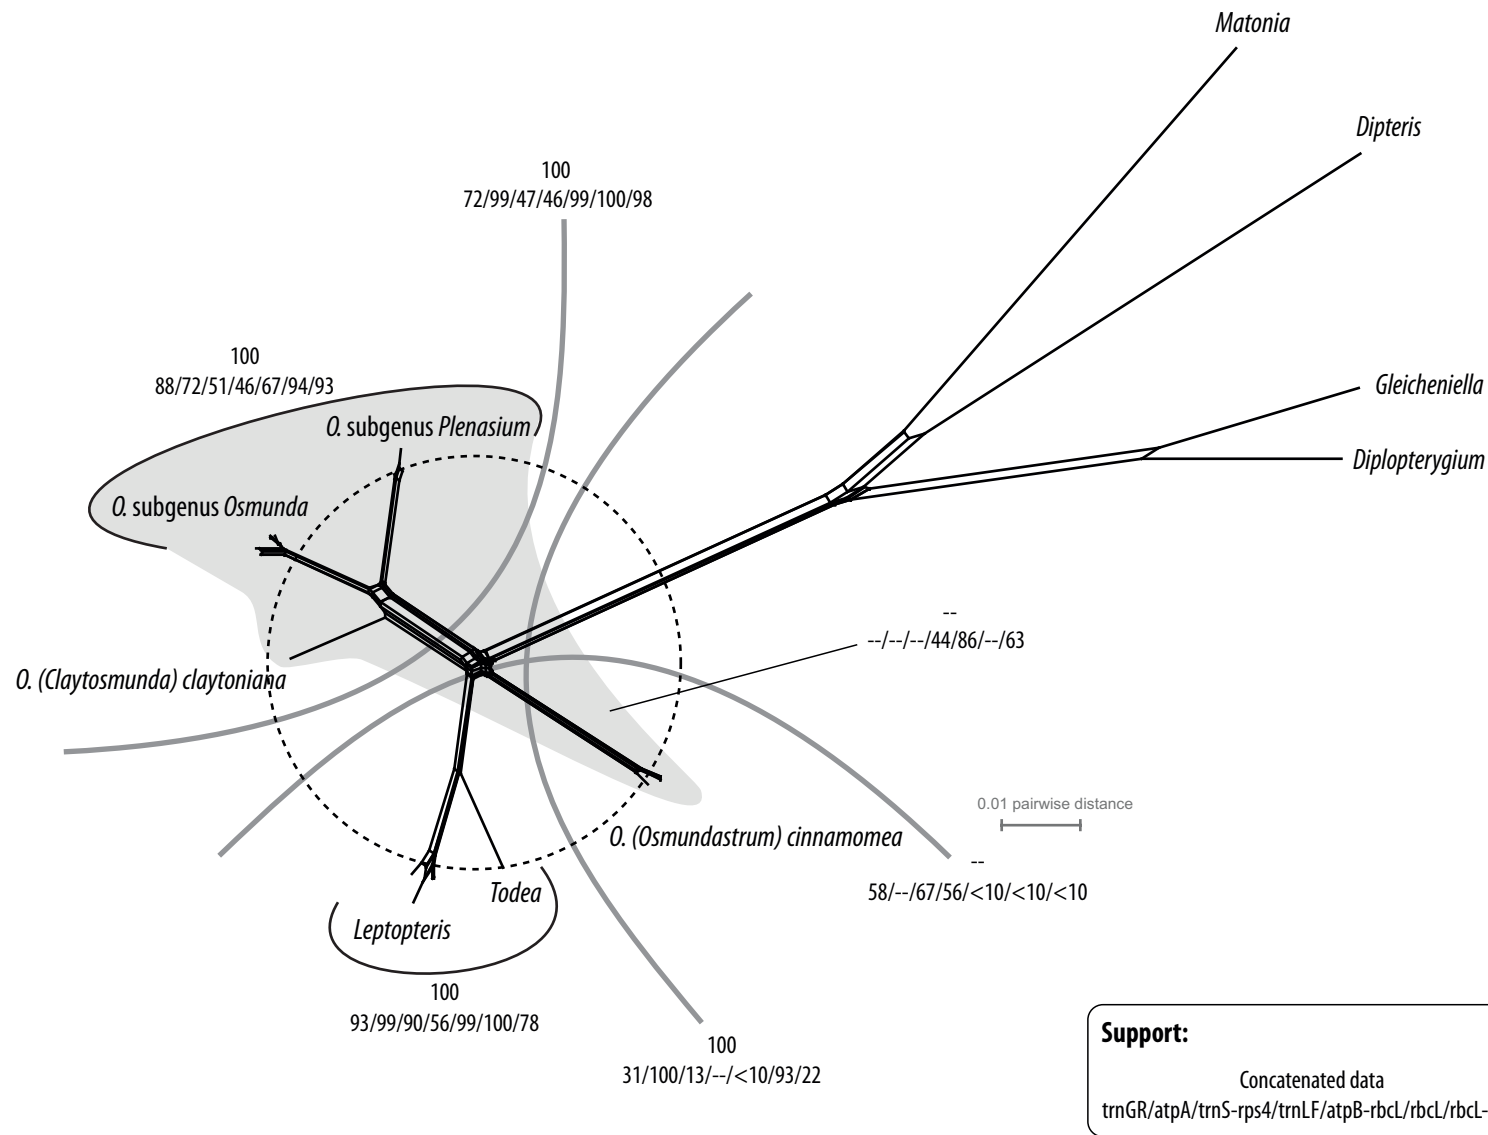

**Bomfleur *et al.*, Fig. S1. Neighbour net inferred from uncorrected pairwise distances based on the concatenated data set of Metzgar *et al.* (2008).** Bootstrap support of (alternative) splits is annotated. Note the occurrence of four genetically distinct lineages; the splits that places *O. cinnamomea* as sister to all other Osmundaceae only received high support from *atpA* and *rbcl* partitions.
